# Supplementary material
Source: Springer Nature journal article supplement (https://www.springermedizin.de/resource/supplementary/12891_2013_2404_MOESM2_ESM.pdf/9509292)
Supplement: MOESM2 [file 9509292]

Records identified through  
database searching  
(n = 755)

Additional records identified  
through other sources  
(n = 5)

Records after duplicates removed  
(n = 572)

Records screened  
(n = 572)

Records excluded  
(n = 538)

Full-text articles  
assessed for  
eligibility (n=34)

Full-text articles  
excluded with  
reasons  
(n = 18)

Studies included for  
qualitative synthesis  
(n = 16)
